# Supplementary material
Source: PubMed Central journal article supplement (PMC2976715)
Supplement: NIHMS244161-supplement-01.pdf [file NIHMS244161-supplement-01.pdf]

Figure S1

mRNA OCT3 expression level

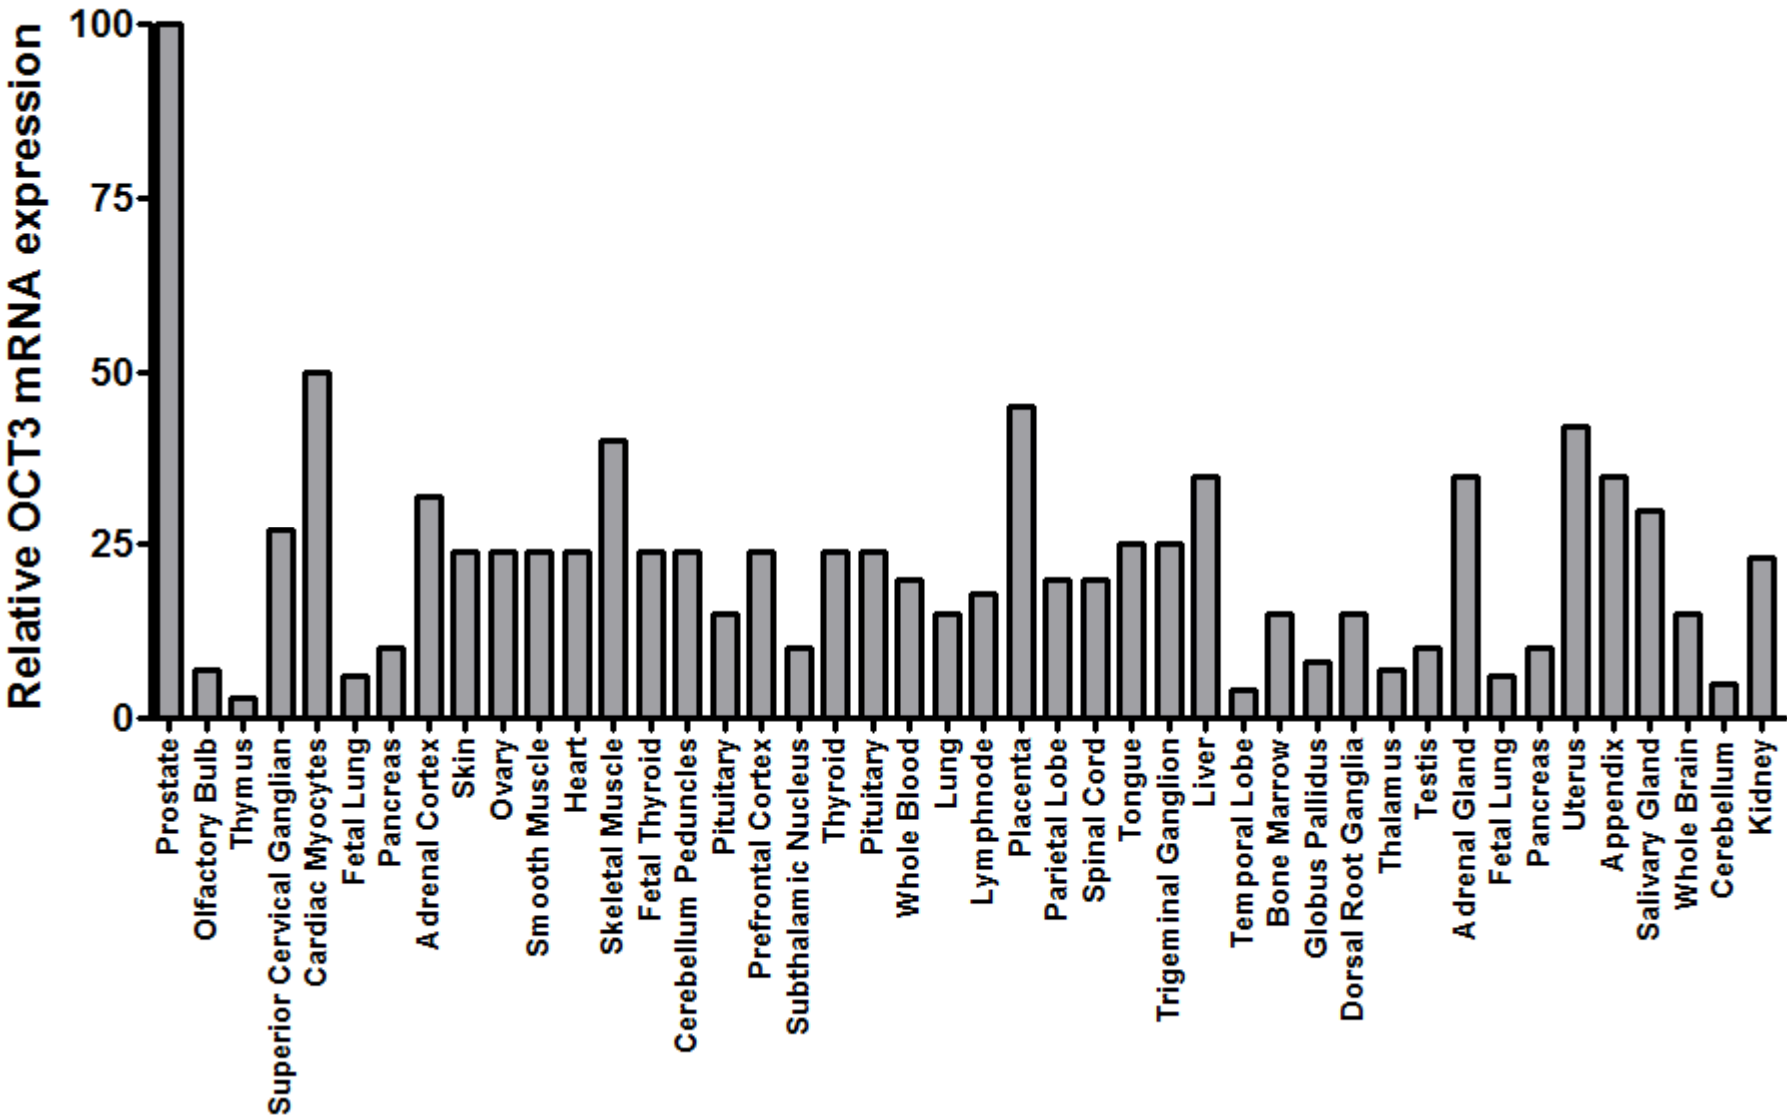

**Figure S2**

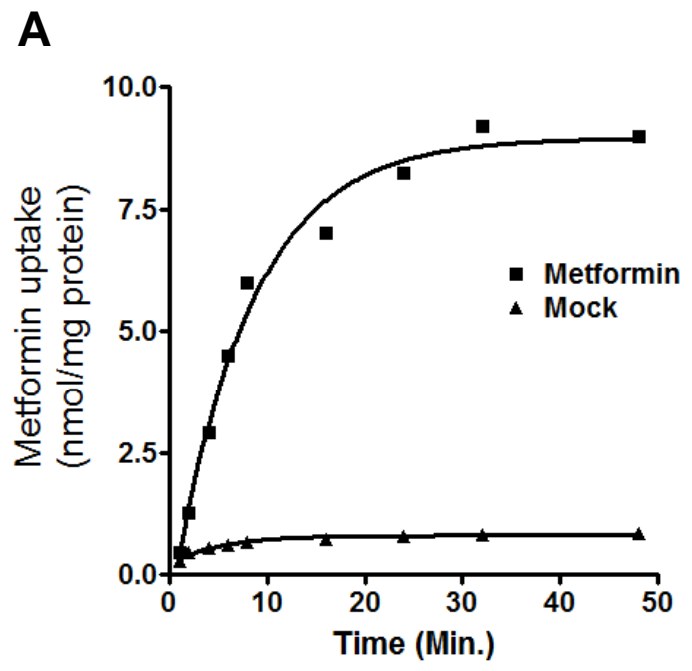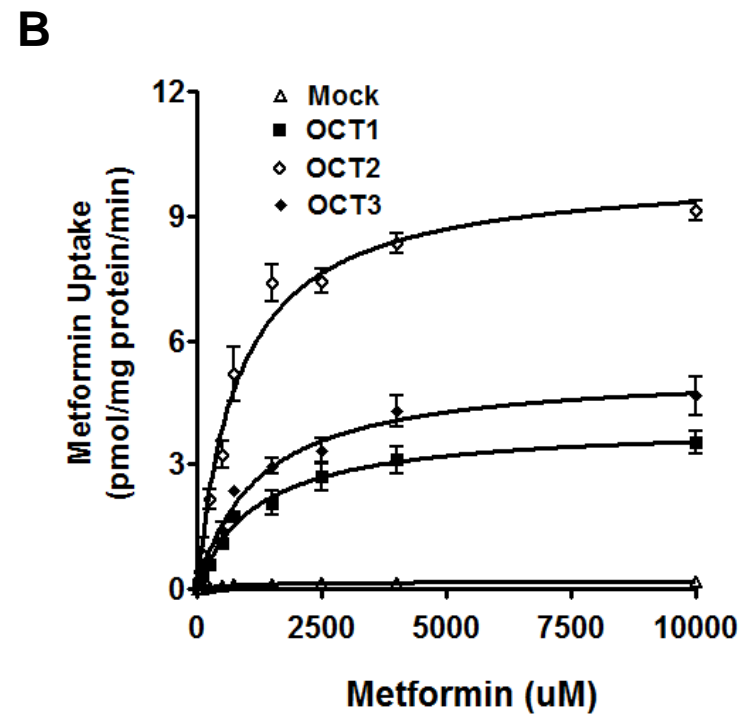

**Figure S3**

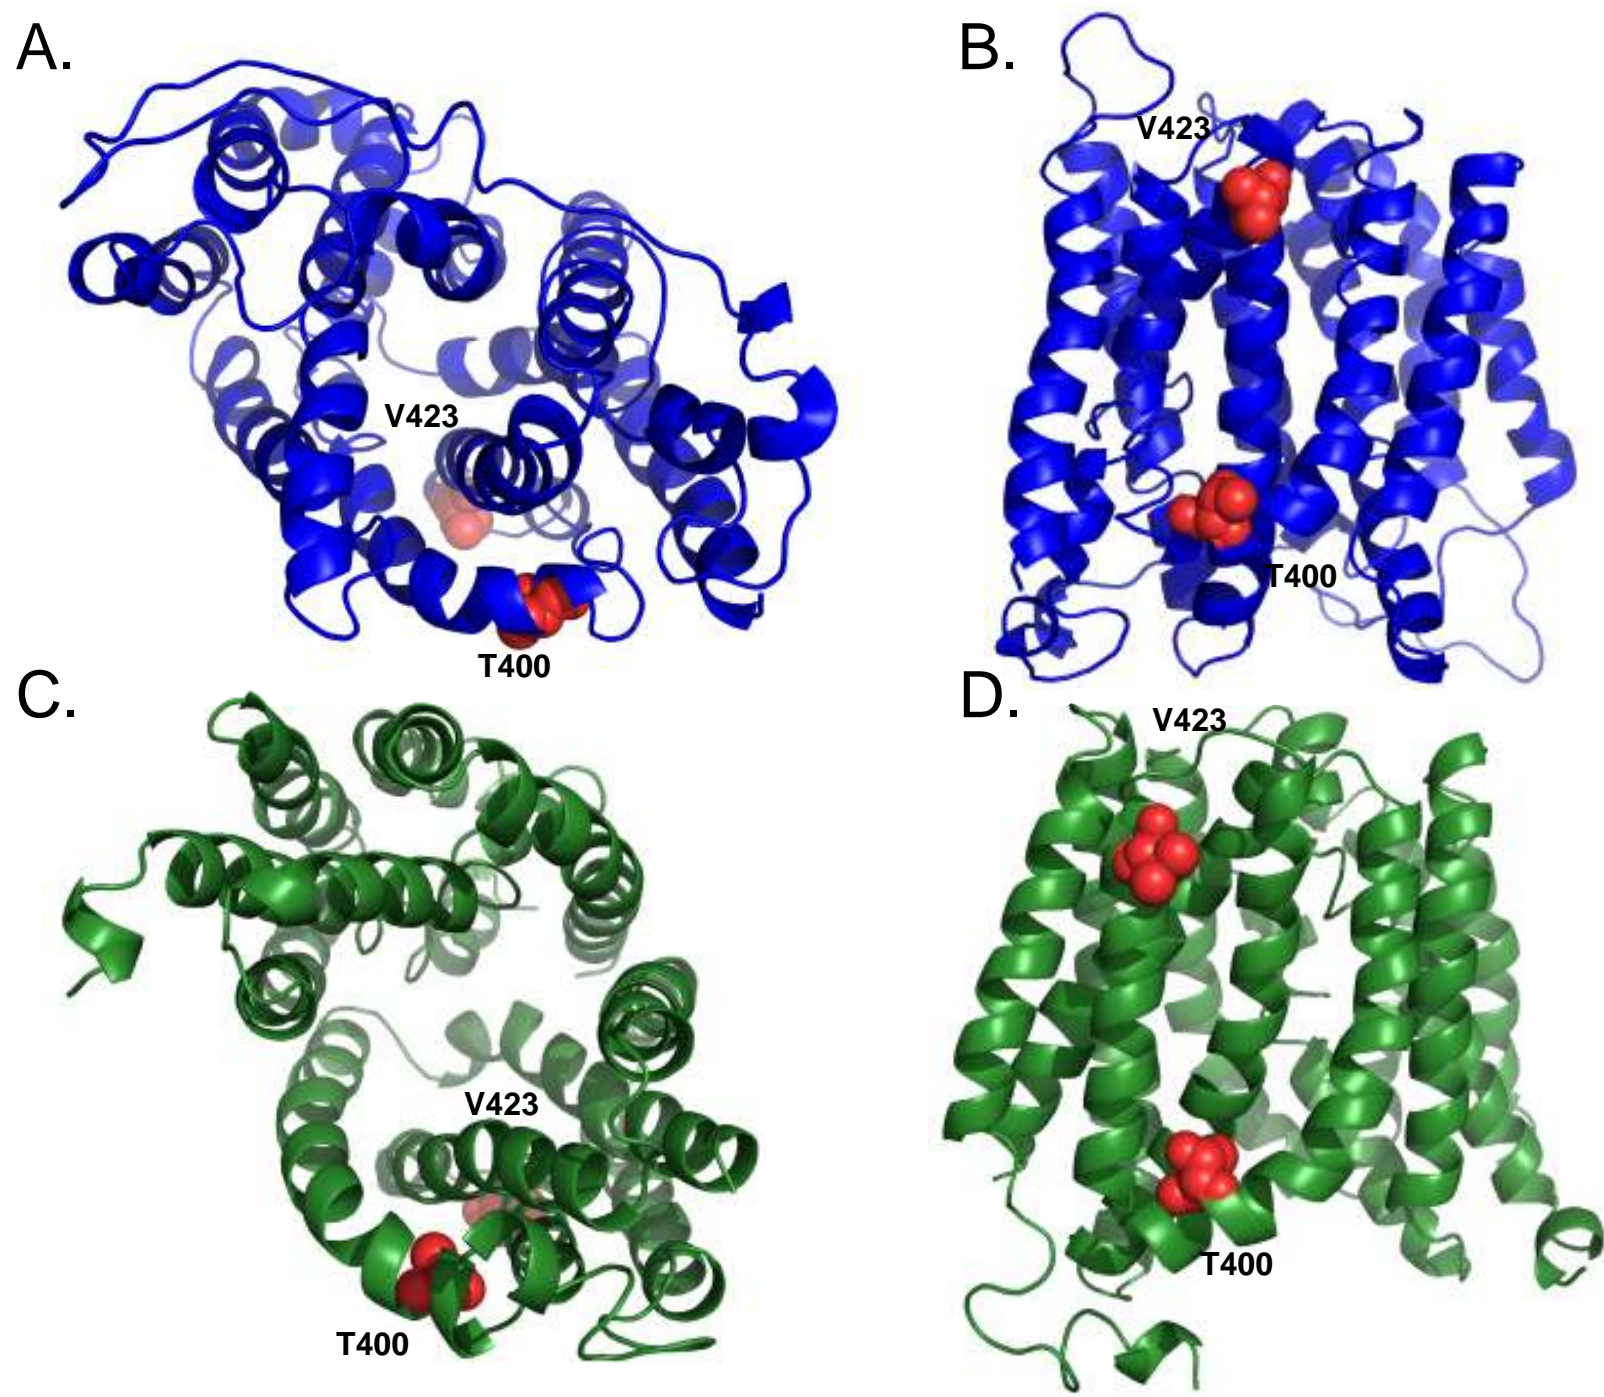

**Table 1S.** Comparison of kinetic parameters of metformin among OCT1-3;

| <b>Kinetic parameter</b>        | <b>OCT1</b> | <b>OCT2</b>  | <b>OCT3</b> |
|---------------------------------|-------------|--------------|-------------|
| $V_{max}$ (nmol/mg protein/min) | 3.96 ± 0.44 | 10.11 ± 0.72 | 4.72 ± 0.54 |
| $K_m$ (mM)                      | 1.18 ± 0.18 | 0.81 ± 0.32  | 1.09 ± 0.21 |
| Ratio ( $V_{max}/K_m$ )         | 3.36        | 11.97        | 4.33        |

**Figure S1.** TaqMan quantitative PCR analysis of OCT3 mRNA expression level in 44 different human tissues listed in the figure. The highest expression of OCT3 mRNA was in the prostate. For each tissue, OCT3 mRNA expression is normalized to prostate expression level (100%).

**Figure S2.** A. The uptake of metformin versus time in the HEK293 cells expressing OCT3-reference. B, Metformin kinetics in HEK293 cells expressing reference OCT1, 2 and 3. Michaelis-Menten parameters were calculated and are shown in Table 3A.

**Figure S3.** Structural models of OCT3 based on both glycerol-3-phosphate (PDB identifier 1PW4) and lactose permease (LacY, PDB identifier 2CFQ) structures. Intra-cellular and side views of cartoon representation of two different OCT3 models were shown: (A) and (B) show the model based on the glycerol-3-phosphate transporter structure, downloaded from MODBASE. (C) and (D) show the OCT3 model based on the lactose permease (LacY) structure (29), relying on MODELLER and a comprehensive alignment of the OCTs and LacY (30). T400 and V423 are illustrated by red spheres.
